# Supplementary material for: Potentially Toxic Elements in Costume Cosmetics Used by Children and Adults Are Associated with Cancer Risk
Source: MDPI journal article supplement (doi:10.3390/ijerph20010531), 2022-12-28
Supplement: s1 [file s1]

## Supplementary Material

Table S1. Inductively Coupled Plasma-Mass Spectrometry operating conditions

| Operating conditions for ICP-MS                                               |                                                                                                                                                                                                                                                                                                                            |
|-------------------------------------------------------------------------------|----------------------------------------------------------------------------------------------------------------------------------------------------------------------------------------------------------------------------------------------------------------------------------------------------------------------------|
| Isotopes monitored and respective limit of detection ( $\mu\text{g L}^{-1}$ ) | $^{27}\text{Al}(3.41)$ , $^{52}\text{Cr}(0.047)$ , $^{59}\text{Co}(0.013)$ , $^{60}\text{Ni}(0.432)$ , $^{63}\text{Cu}(2.92)$ , $^{75}\text{As}(0.034)$ , $^{88}\text{Sr}(0.049)$ , $^{111}\text{Cd}(0.006)$ , $^{120}\text{Sn}(0.063)$ , $^{121}\text{Sb}(0.013)$ , $^{137}\text{Ba}(0.074)$ , $^{208}\text{Pb}(0.045)$ . |
| Internal Standards                                                            | Ge <sup>72</sup> (used for Al, Cr, Co, Ni and Cu)<br>Y <sup>89</sup> (used for As, Sr, Cd, Sn and Sb)<br>Ir <sup>193</sup> (used for Ba and Pb)<br>Purchased from Inorganic Ventures (USA). Prepared at 10 $\mu\text{g L}^{-1}$ and injected online by splitting.                                                          |
| Radio Frequency Power                                                         | 1550 W                                                                                                                                                                                                                                                                                                                     |
| Torch sample depth                                                            | 8 mm                                                                                                                                                                                                                                                                                                                       |
| Argon Flow Rate                                                               | 15 L min <sup>-1</sup>                                                                                                                                                                                                                                                                                                     |
| Nebulizer Gas Flow Rate                                                       | 0.9 L min <sup>-1</sup>                                                                                                                                                                                                                                                                                                    |
| Nebulizer                                                                     | Micro Mist <sup>TM</sup>                                                                                                                                                                                                                                                                                                   |
| Peristaltic Pump tuning                                                       | Internal diameter: 1.02mm; wall 0.86mm                                                                                                                                                                                                                                                                                     |
| Sample uptake                                                                 | 0.45 rps                                                                                                                                                                                                                                                                                                                   |
| Sample introduction                                                           | 1 ml/min (0.3 rps)                                                                                                                                                                                                                                                                                                         |
| Carrier Nebulizer Gas Flow rate                                               | 1.03 L min <sup>-1</sup>                                                                                                                                                                                                                                                                                                   |
| Stabilization time                                                            | 5 s                                                                                                                                                                                                                                                                                                                        |
| Collision Cell                                                                | Helium (purity >99.99%)                                                                                                                                                                                                                                                                                                    |
| Nebulizer Chamber                                                             | Scott (double pass)                                                                                                                                                                                                                                                                                                        |
| Interface                                                                     | Platinum cones                                                                                                                                                                                                                                                                                                             |
| Sampling Cone                                                                 | 1 mm                                                                                                                                                                                                                                                                                                                       |
| Skimmer                                                                       | 0.9 mm                                                                                                                                                                                                                                                                                                                     |

Table S2. Element recoveries in percentage (%) compared to the certified value. Values are expressed as a median  $\pm$  standard deviation of analyzed CRMs, n=3.

| Element | CRM       | Recovery % (median $\pm$ SD) |
|---------|-----------|------------------------------|
| Al      | NIST 2709 | 76 $\pm$ 7                   |
| Cr      | NIST 2709 | 111 $\pm$ 2                  |
| Co      | NIST 2709 | 88 $\pm$ 2                   |
| Ni      | NIST 2709 | 82 $\pm$ 2                   |
| Cu      | NIST 1573 | 88 $\pm$ 1                   |
| As      | C1003a    | 106 $\pm$ 2                  |
| Sr      | C1003a    | 88 $\pm$ 2                   |
| Cd      | CC141     | 94 $\pm$ 1                   |
| Sn      | NI        | -                            |
| Sb      | NIST 1573 | 92 $\pm$ 7                   |
| Ba      | NIST 2709 | 84 $\pm$ 6                   |
| Pb      | CC141     | 90 $\pm$ 1                   |

NI: not informed

Table S3. Non-cancer risk or hazard quotient (HQ) for all Potentially Toxic Elements (PTEs) determined in face paints and pancakes, results for dermal and ingestion exposures for both sexes in children and adults.

| PTEs  | Sex | Children: age 2 to < 3 years |                       |                       |                       | Children: age 3 to < 6 years |                       |                       |                       | Children: age 6 to < 11 years |                       |                       |                       | Adults: age ≥ 21 years |                       |                       |                       |
|-------|-----|------------------------------|-----------------------|-----------------------|-----------------------|------------------------------|-----------------------|-----------------------|-----------------------|-------------------------------|-----------------------|-----------------------|-----------------------|------------------------|-----------------------|-----------------------|-----------------------|
|       |     | Face paints                  |                       | Pancake               |                       | Face paints                  |                       | Pancake               |                       | Face paints                   |                       | Pancake               |                       | Face paints            |                       | Pancake               |                       |
|       |     | Dermal                       | Ingestion             | Dermal                | Ingestion             | Dermal                       | Ingestion             | Dermal                | Ingestion             | Dermal                        | Ingestion             | Dermal                | Ingestion             | Dermal                 | Ingestion             | Dermal                | Ingestion             |
| Al    | F   | 5.17×10 <sup>-4</sup>        | 3.07×10 <sup>-2</sup> | 1.85×10 <sup>-3</sup> | 1.10×10 <sup>-1</sup> | 4.00×10 <sup>-4</sup>        | 2.37×10 <sup>-2</sup> | 1.43×10 <sup>-3</sup> | 8.48×10 <sup>-2</sup> | 2.49×10 <sup>-4</sup>         | 1.48×10 <sup>-2</sup> | 8.90×10 <sup>-4</sup> | 5.28×10 <sup>-2</sup> | 1.01×10 <sup>-1</sup>  | 8.61×10 <sup>-2</sup> | 3.63×10 <sup>-1</sup> | 3.08×10 <sup>-1</sup> |
|       | M   | 5.00×10 <sup>-4</sup>        | 2.96×10 <sup>-2</sup> | 1.79×10 <sup>-3</sup> | 1.06×10 <sup>-1</sup> | 3.93×10 <sup>-4</sup>        | 2.33×10 <sup>-2</sup> | 1.41×10 <sup>-3</sup> | 8.34×10 <sup>-2</sup> | 2.54×10 <sup>-4</sup>         | 1.50×10 <sup>-2</sup> | 9.08×10 <sup>-4</sup> | 5.38×10 <sup>-2</sup> | 8.77×10 <sup>-2</sup>  | 7.45×10 <sup>-2</sup> | 3.14×10 <sup>-1</sup> | 2.66×10 <sup>-1</sup> |
| As    | F   | 7.07×10 <sup>-3</sup>        | 1.40×10 <sup>-2</sup> | 1.56×10 <sup>-2</sup> | 3.09×10 <sup>-2</sup> | 5.46×10 <sup>-3</sup>        | 1.08×10 <sup>-2</sup> | 1.21×10 <sup>-2</sup> | 2.38×10 <sup>-2</sup> | 3.40×10 <sup>-3</sup>         | 6.72×10 <sup>-3</sup> | 7.50×10 <sup>-3</sup> | 1.48×10 <sup>-2</sup> | 1.39×10 <sup>0</sup>   | 3.92×10 <sup>-2</sup> | 3.06×10 <sup>0</sup>  | 8.66×10 <sup>-2</sup> |
|       | M   | 6.83×10 <sup>-3</sup>        | 1.35×10 <sup>-2</sup> | 1.51×10 <sup>-2</sup> | 2.98×10 <sup>-2</sup> | 5.37×10 <sup>-3</sup>        | 1.06×10 <sup>-2</sup> | 1.19×10 <sup>-2</sup> | 2.34×10 <sup>-2</sup> | 3.47×10 <sup>-3</sup>         | 6.86×10 <sup>-3</sup> | 7.65×10 <sup>-3</sup> | 1.51×10 <sup>-2</sup> | 1.20×10 <sup>0</sup>   | 3.39×10 <sup>-2</sup> | 2.65×10 <sup>0</sup>  | 7.49×10 <sup>-2</sup> |
| Ba    | F   | 4.51×10 <sup>-5</sup>        | 1.87×10 <sup>-2</sup> | 7.17×10 <sup>-6</sup> | 2.98×10 <sup>-3</sup> | 3.48×10 <sup>-5</sup>        | 1.45×10 <sup>-2</sup> | 5.54×10 <sup>-6</sup> | 2.30×10 <sup>-3</sup> | 2.17×10 <sup>-5</sup>         | 9.00×10 <sup>-3</sup> | 3.45×10 <sup>-6</sup> | 1.43×10 <sup>-3</sup> | 8.84×10 <sup>-3</sup>  | 5.26×10 <sup>-2</sup> | 1.41×10 <sup>-3</sup> | 8.36×10 <sup>-3</sup> |
|       | M   | 4.36×10 <sup>-5</sup>        | 1.81×10 <sup>-2</sup> | 6.93×10 <sup>-6</sup> | 2.88×10 <sup>-3</sup> | 3.43×10 <sup>-5</sup>        | 1.42×10 <sup>-2</sup> | 5.45×10 <sup>-6</sup> | 2.26×10 <sup>-3</sup> | 2.21×10 <sup>-5</sup>         | 9.18×10 <sup>-3</sup> | 3.52×10 <sup>-6</sup> | 1.46×10 <sup>-3</sup> | 7.64×10 <sup>-3</sup>  | 4.55×10 <sup>-2</sup> | 1.22×10 <sup>-3</sup> | 7.23×10 <sup>-3</sup> |
| Cd    | F   | 1.96×10 <sup>-6</sup>        | 5.82×10 <sup>-4</sup> | 1.51×10 <sup>-5</sup> | 4.48×10 <sup>-3</sup> | 1.52×10 <sup>-6</sup>        | 4.50×10 <sup>-4</sup> | 1.17×10 <sup>-5</sup> | 3.46×10 <sup>-3</sup> | 9.44×10 <sup>-7</sup>         | 2.80×10 <sup>-4</sup> | 7.26×10 <sup>-6</sup> | 2.15×10 <sup>-3</sup> | 3.85×10 <sup>-4</sup>  | 1.63×10 <sup>-3</sup> | 2.96×10 <sup>-3</sup> | 1.26×10 <sup>-2</sup> |
|       | M   | 1.90×10 <sup>-6</sup>        | 5.63×10 <sup>-4</sup> | 1.46×10 <sup>-5</sup> | 4.33×10 <sup>-3</sup> | 1.49×10 <sup>-6</sup>        | 4.42×10 <sup>-4</sup> | 1.15×10 <sup>-5</sup> | 3.40×10 <sup>-3</sup> | 9.63×10 <sup>-7</sup>         | 2.86×10 <sup>-4</sup> | 7.41×10 <sup>-6</sup> | 2.20×10 <sup>-3</sup> | 3.33×10 <sup>-4</sup>  | 1.41×10 <sup>-3</sup> | 2.56×10 <sup>-3</sup> | 1.09×10 <sup>-2</sup> |
| Co    | F   | 6.83×10 <sup>-7</sup>        | 4.05×10 <sup>-5</sup> | 1.68×10 <sup>-5</sup> | 9.94×10 <sup>-4</sup> | 5.28×10 <sup>-7</sup>        | 3.13×10 <sup>-5</sup> | 1.30×10 <sup>-5</sup> | 7.68×10 <sup>-4</sup> | 3.28×10 <sup>-7</sup>         | 1.95×10 <sup>-5</sup> | 8.06×10 <sup>-6</sup> | 4.78×10 <sup>-4</sup> | 1.34×10 <sup>-4</sup>  | 1.14×10 <sup>-4</sup> | 3.29×10 <sup>-3</sup> | 2.79×10 <sup>-3</sup> |
|       | M   | 6.60×10 <sup>-7</sup>        | 3.91×10 <sup>-5</sup> | 1.62×10 <sup>-5</sup> | 9.61×10 <sup>-4</sup> | 5.19×10 <sup>-7</sup>        | 3.08×10 <sup>-5</sup> | 1.27×10 <sup>-5</sup> | 7.55×10 <sup>-4</sup> | 3.35×10 <sup>-7</sup>         | 1.99×10 <sup>-5</sup> | 8.22×10 <sup>-6</sup> | 4.88×10 <sup>-4</sup> | 1.16×10 <sup>-4</sup>  | 9.83×10 <sup>-5</sup> | 2.84×10 <sup>-3</sup> | 2.41×10 <sup>-3</sup> |
| CrIII | F   | 1.79×10 <sup>-7</sup>        | 1.38×10 <sup>-5</sup> | 3.40×10 <sup>-6</sup> | 2.62×10 <sup>-4</sup> | 1.38×10 <sup>-7</sup>        | 1.06×10 <sup>-5</sup> | 2.63×10 <sup>-6</sup> | 2.03×10 <sup>-4</sup> | 8.59×10 <sup>-8</sup>         | 6.62×10 <sup>-6</sup> | 1.64×10 <sup>-6</sup> | 1.26×10 <sup>-4</sup> | 3.50×10 <sup>-5</sup>  | 3.87×10 <sup>-5</sup> | 6.67×10 <sup>-4</sup> | 7.36×10 <sup>-4</sup> |
|       | M   | 1.73×10 <sup>-7</sup>        | 1.33×10 <sup>-5</sup> | 3.29×10 <sup>-6</sup> | 2.54×10 <sup>-4</sup> | 1.36×10 <sup>-7</sup>        | 1.05×10 <sup>-5</sup> | 2.58×10 <sup>-6</sup> | 1.99×10 <sup>-4</sup> | 8.76×10 <sup>-8</sup>         | 6.76×10 <sup>-6</sup> | 1.67×10 <sup>-6</sup> | 1.29×10 <sup>-4</sup> | 3.03×10 <sup>-5</sup>  | 3.34×10 <sup>-5</sup> | 5.77×10 <sup>-4</sup> | 6.37×10 <sup>-4</sup> |
| CrVI  | F   | 1.24×10 <sup>-3</sup>        | 4.59×10 <sup>-3</sup> | 2.36×10 <sup>-2</sup> | 8.74×10 <sup>-2</sup> | 9.57×10 <sup>-4</sup>        | 3.55×10 <sup>-3</sup> | 1.82×10 <sup>-2</sup> | 6.76×10 <sup>-2</sup> | 5.95×10 <sup>-4</sup>         | 2.21×10 <sup>-3</sup> | 1.13×10 <sup>-2</sup> | 4.20×10 <sup>-2</sup> | 2.43×10 <sup>-1</sup>  | 1.29×10 <sup>-2</sup> | 4.62×10 <sup>0</sup>  | 2.45×10 <sup>-1</sup> |
|       | M   | 1.20×10 <sup>-3</sup>        | 4.44×10 <sup>-3</sup> | 2.28×10 <sup>-2</sup> | 8.45×10 <sup>-2</sup> | 9.41×10 <sup>-4</sup>        | 3.49×10 <sup>-3</sup> | 1.79×10 <sup>-2</sup> | 6.64×10 <sup>-2</sup> | 6.07×10 <sup>-4</sup>         | 2.25×10 <sup>-3</sup> | 1.16×10 <sup>-2</sup> | 4.29×10 <sup>-2</sup> | 2.10×10 <sup>-1</sup>  | 1.11×10 <sup>-2</sup> | 4.00×10 <sup>0</sup>  | 2.12×10 <sup>-1</sup> |
| Cu    | F   | 1.23×10 <sup>-3</sup>        | 7.00×10 <sup>-2</sup> | 8.70×10 <sup>-5</sup> | 5.16×10 <sup>-3</sup> | 9.53×10 <sup>-4</sup>        | 5.41×10 <sup>-2</sup> | 6.72×10 <sup>-5</sup> | 3.99×10 <sup>-3</sup> | 5.93×10 <sup>-4</sup>         | 3.37×10 <sup>-2</sup> | 4.18×10 <sup>-5</sup> | 2.48×10 <sup>-3</sup> | 2.09×10 <sup>-1</sup>  | 1.70×10 <sup>-1</sup> | 2.42×10 <sup>-1</sup> | 1.97×10 <sup>-1</sup> |
|       | M   | 1.19×10 <sup>-3</sup>        | 6.77×10 <sup>-2</sup> | 8.41×10 <sup>-5</sup> | 4.99×10 <sup>-3</sup> | 9.37×10 <sup>-4</sup>        | 5.32×10 <sup>-2</sup> | 6.61×10 <sup>-5</sup> | 3.92×10 <sup>-3</sup> | 6.05×10 <sup>-4</sup>         | 3.44×10 <sup>-2</sup> | 4.27×10 <sup>-5</sup> | 2.53×10 <sup>-3</sup> | 1.47×10 <sup>-2</sup>  | 1.25×10 <sup>-2</sup> | 1.71×10 <sup>-2</sup> | 1.45×10 <sup>-2</sup> |
| Ni    | F   | 1.29×10 <sup>-6</sup>        | 3.06×10 <sup>-4</sup> | 1.38×10 <sup>-5</sup> | 3.27×10 <sup>-3</sup> | 9.96×10 <sup>-7</sup>        | 2.36×10 <sup>-4</sup> | 1.07×10 <sup>-5</sup> | 2.53×10 <sup>-3</sup> | 6.20×10 <sup>-7</sup>         | 1.47×10 <sup>-4</sup> | 6.63×10 <sup>-6</sup> | 1.57×10 <sup>-3</sup> | 2.53×10 <sup>-4</sup>  | 8.58×10 <sup>-4</sup> | 2.70×10 <sup>-3</sup> | 9.18×10 <sup>-3</sup> |
|       | M   | 1.25×10 <sup>-6</sup>        | 2.96×10 <sup>-4</sup> | 1.33×10 <sup>-5</sup> | 3.16×10 <sup>-3</sup> | 9.79×10 <sup>-7</sup>        | 2.32×10 <sup>-4</sup> | 1.05×10 <sup>-5</sup> | 2.48×10 <sup>-3</sup> | 6.32×10 <sup>-7</sup>         | 1.50×10 <sup>-4</sup> | 6.76×10 <sup>-6</sup> | 1.60×10 <sup>-3</sup> | 2.18×10 <sup>-4</sup>  | 7.42×10 <sup>-4</sup> | 2.34×10 <sup>-3</sup> | 7.94×10 <sup>-3</sup> |
| Sb    | F   | 4.31×10 <sup>-6</sup>        | 3.84×10 <sup>-3</sup> | 1.11×10 <sup>-6</sup> | 9.83×10 <sup>-4</sup> | 3.33×10 <sup>-6</sup>        | 2.97×10 <sup>-3</sup> | 8.54×10 <sup>-7</sup> | 7.60×10 <sup>-4</sup> | 2.07×10 <sup>-6</sup>         | 1.85×10 <sup>-3</sup> | 5.31×10 <sup>-7</sup> | 4.73×10 <sup>-4</sup> | 8.46×10 <sup>-4</sup>  | 1.08×10 <sup>-2</sup> | 2.17×10 <sup>-4</sup> | 2.76×10 <sup>-3</sup> |
|       | M   | 4.17×10 <sup>-6</sup>        | 3.71×10 <sup>-3</sup> | 1.07×10 <sup>-6</sup> | 9.50×10 <sup>-4</sup> | 3.28×10 <sup>-6</sup>        | 2.92×10 <sup>-3</sup> | 8.39×10 <sup>-7</sup> | 7.47×10 <sup>-4</sup> | 2.12×10 <sup>-6</sup>         | 1.88×10 <sup>-3</sup> | 5.42×10 <sup>-7</sup> | 4.82×10 <sup>-4</sup> | 7.31×10 <sup>-4</sup>  | 9.32×10 <sup>-3</sup> | 1.87×10 <sup>-4</sup> | 2.39×10 <sup>-3</sup> |
| Sn    | F   | 1.40×10 <sup>-7</sup>        | 8.30×10 <sup>-6</sup> | 3.14×10 <sup>-7</sup> | 1.86×10 <sup>-5</sup> | 1.08×10 <sup>-7</sup>        | 6.42×10 <sup>-6</sup> | 2.43×10 <sup>-7</sup> | 1.44×10 <sup>-5</sup> | 6.73×10 <sup>-8</sup>         | 3.99×10 <sup>-6</sup> | 1.51×10 <sup>-7</sup> | 8.96×10 <sup>-6</sup> | 2.74×10 <sup>-5</sup>  | 2.33×10 <sup>-5</sup> | 6.16×10 <sup>-5</sup> | 5.23×10 <sup>-5</sup> |
|       | M   | 1.35×10 <sup>-7</sup>        | 8.03×10 <sup>-6</sup> | 3.04×10 <sup>-7</sup> | 1.80×10 <sup>-5</sup> | 1.06×10 <sup>-7</sup>        | 6.31×10 <sup>-6</sup> | 2.39×10 <sup>-7</sup> | 1.41×10 <sup>-5</sup> | 6.87×10 <sup>-8</sup>         | 4.07×10 <sup>-6</sup> | 1.54×10 <sup>-7</sup> | 9.14×10 <sup>-6</sup> | 2.37×10 <sup>-5</sup>  | 2.02×10 <sup>-5</sup> | 5.32×10 <sup>-5</sup> | 4.52×10 <sup>-5</sup> |
| Sr    | F   | 4.97×10 <sup>-5</sup>        | 2.95×10 <sup>-3</sup> | 2.60×10 <sup>-6</sup> | 1.54×10 <sup>-4</sup> | 3.84×10 <sup>-5</sup>        | 2.28×10 <sup>-3</sup> | 2.01×10 <sup>-6</sup> | 1.19×10 <sup>-4</sup> | 2.39×10 <sup>-5</sup>         | 1.42×10 <sup>-3</sup> | 1.25×10 <sup>-6</sup> | 7.41×10 <sup>-5</sup> | 9.74×10 <sup>-3</sup>  | 8.28×10 <sup>-3</sup> | 5.09×10 <sup>-4</sup> | 4.33×10 <sup>-4</sup> |
|       | M   | 4.80×10 <sup>-5</sup>        | 2.85×10 <sup>-3</sup> | 2.51×10 <sup>-6</sup> | 1.49×10 <sup>-4</sup> | 3.78×10 <sup>-5</sup>        | 2.24×10 <sup>-3</sup> | 1.97×10 <sup>-6</sup> | 1.17×10 <sup>-4</sup> | 2.44×10 <sup>-5</sup>         | 1.45×10 <sup>-3</sup> | 1.27×10 <sup>-6</sup> | 7.56×10 <sup>-5</sup> | 8.43×10 <sup>-3</sup>  | 7.16×10 <sup>-3</sup> | 4.41×10 <sup>-4</sup> | 3.74×10 <sup>-4</sup> |

Table S4. Cancer risk (CR) for all Potentially Toxic Elements (PTEs) determined in face paints and pancakes, results for dermal and ingestion exposures for both sexes in children and adults.

| PTEs        | Sex | Children: age 2 to < 3 years |                       |                        |                       | Children: age 3 to < 6 years |                       |                        |                       | Children: age 6 to < 11 years |                       |                        |                       | Adults: age ≥ 21 years |                       |                       |                       |
|-------------|-----|------------------------------|-----------------------|------------------------|-----------------------|------------------------------|-----------------------|------------------------|-----------------------|-------------------------------|-----------------------|------------------------|-----------------------|------------------------|-----------------------|-----------------------|-----------------------|
|             |     | <u>Face paints</u>           |                       | <u>Pancake</u>         |                       | <u>Face paints</u>           |                       | <u>Pancake</u>         |                       | <u>Face paints</u>            |                       | <u>Pancake</u>         |                       | <u>Face paints</u>     |                       | <u>Pancake</u>        |                       |
|             |     | Dermal                       | Ingestion             | Dermal                 | Ingestion             | Dermal                       | Ingestion             | Dermal                 | Ingestion             | Dermal                        | Ingestion             | Dermal                 | Ingestion             | Dermal                 | Ingestion             | Dermal                | Ingestion             |
| <b>As</b>   | F   | 2.88×10 <sup>-7</sup>        | 3.98×10 <sup>-5</sup> | 6.35×10 <sup>-7</sup>  | 8.79×10 <sup>-5</sup> | 6.67×10 <sup>-7</sup>        | 3.08×10 <sup>-5</sup> | 1.47×10 <sup>-6</sup>  | 6.79×10 <sup>-5</sup> | 6.92×10 <sup>-7</sup>         | 1.92×10 <sup>-5</sup> | 1.53×10 <sup>-6</sup>  | 4.23×10 <sup>-5</sup> | 1.97×10 <sup>-3</sup>  | 1.12×10 <sup>-4</sup> | 3.77×10 <sup>-3</sup> | 2.47×10 <sup>-4</sup> |
|             | M   | 2.78×10 <sup>-7</sup>        | 3.85×10 <sup>-5</sup> | 6.14×10 <sup>-7</sup>  | 8.50×10 <sup>-5</sup> | 6.56×10 <sup>-7</sup>        | 3.03×10 <sup>-5</sup> | 1.45×10 <sup>-6</sup>  | 6.68×10 <sup>-5</sup> | 7.06×10 <sup>-7</sup>         | 1.95×10 <sup>-5</sup> | 1.56×10 <sup>-6</sup>  | 4.31×10 <sup>-5</sup> | 1.71×10 <sup>-3</sup>  | 9.67×10 <sup>-5</sup> | 4.36×10 <sup>-3</sup> | 2.14×10 <sup>-4</sup> |
| <b>CrVI</b> | F   | 2.65×10 <sup>-8</sup>        | 6.89×10 <sup>-6</sup> | 5.05×10 <sup>-7</sup>  | 1.31×10 <sup>-4</sup> | 6.15×10 <sup>-8</sup>        | 5.32×10 <sup>-6</sup> | 1.17×10 <sup>-6</sup>  | 1.01×10 <sup>-4</sup> | 6.38×10 <sup>-8</sup>         | 3.31×10 <sup>-6</sup> | 1.22×10 <sup>-6</sup>  | 6.31×10 <sup>-5</sup> | 4.55×10 <sup>-4</sup>  | 1.93×10 <sup>-5</sup> | 3.00×10 <sup>-3</sup> | 3.68×10 <sup>-4</sup> |
|             | M   | 2.56×10 <sup>-8</sup>        | 6.66×10 <sup>-6</sup> | 4.89×10 <sup>-7</sup>  | 1.27×10 <sup>-4</sup> | 6.05×10 <sup>-8</sup>        | 5.23×10 <sup>-6</sup> | 1.15×10 <sup>-6</sup>  | 9.96×10 <sup>-5</sup> | 6.51×10 <sup>-8</sup>         | 3.38×10 <sup>-6</sup> | 1.24×10 <sup>-6</sup>  | 6.43×10 <sup>-5</sup> | 3.94×10 <sup>-4</sup>  | 1.67×10 <sup>-5</sup> | 8.67×10 <sup>-3</sup> | 3.18×10 <sup>-4</sup> |
| <b>Pb</b>   | F   | 1.90×10 <sup>-11</sup>       | 7.88×10 <sup>-8</sup> | 1.79×10 <sup>-10</sup> | 7.44×10 <sup>-7</sup> | 4.40×10 <sup>-11</sup>       | 6.09×10 <sup>-8</sup> | 4.15×10 <sup>-10</sup> | 5.75×10 <sup>-7</sup> | 4.56×10 <sup>-11</sup>        | 3.79×10 <sup>-8</sup> | 4.31×10 <sup>-10</sup> | 3.58×10 <sup>-7</sup> | 1.30×10 <sup>-7</sup>  | 2.21×10 <sup>-7</sup> | 1.06×10 <sup>-6</sup> | 2.09×10 <sup>-6</sup> |
|             | M   | 1.83×10 <sup>-11</sup>       | 7.62×10 <sup>-8</sup> | 1.73×10 <sup>-10</sup> | 7.19×10 <sup>-7</sup> | 4.32×10 <sup>-11</sup>       | 5.99×10 <sup>-8</sup> | 4.08×10 <sup>-10</sup> | 5.65×10 <sup>-7</sup> | 4.65×10 <sup>-11</sup>        | 3.87×10 <sup>-8</sup> | 4.40×10 <sup>-10</sup> | 3.65×10 <sup>-7</sup> | 1.13×10 <sup>-7</sup>  | 1.91×10 <sup>-7</sup> | 1.23×10 <sup>-6</sup> | 1.81×10 <sup>-6</sup> |
